# Supplementary material for: Preamplification with dUTP and Cod UNG Enables Elimination of Contaminating Amplicons
Source: PubMed Central journal article supplement (PMC6214100; doi:10.3390/ijms19103185), 2018-10-16
Supplement: ijms-19-03185-s001.pdf [file ijms-19-03185-s001.pdf]

Supplementary Table S1: Detailed qPCR assay information.

| Gene          | Ref Seq.                       | Forward primer [5'-3']<br>Reverse primer [5'-3']    | Amplicon length [bp]<br>Bp between primers | <sup>1</sup> nT or nU | <sup>2</sup> PCR E <sub>amp</sub><br><sup>3</sup> PCR E <sub>UTP</sub> | <sup>4</sup> Molecules/reaction<br><sup>5</sup> T or U |
|---------------|--------------------------------|-----------------------------------------------------|--------------------------------------------|-----------------------|------------------------------------------------------------------------|--------------------------------------------------------|
| <i>APAF1</i>  | <a href="#">NM_013229.2</a>    | ATGGAACAGTGAAGGTATGGAA<br>AGCAGAGGTAGATGAAAACCTGGT  | 125<br>79                                  | 51                    | 100.8%<br>94.1%                                                        | 1<br>U                                                 |
| <i>ATM</i>    | <a href="#">NM_000051.3</a>    | CCGTCAGCAAAGAAGTAGAAGGA<br>GCTAAGTGTGGGATAGAGCGA    | 182<br>138                                 | 86                    | 109.2%<br>97.7%                                                        | 1<br>U                                                 |
| <i>ATR</i>    | <a href="#">NM_001184.3</a>    | GGATGCCACTGCTTGTATGA<br>TCCACTCGGACCTGTTAGC         | 152<br>112                                 | 63                    | 105.5%<br>97.6%                                                        | 1<br>U                                                 |
| <i>BBC3</i>   | <a href="#">NM_001127240.2</a> | TACGAGCGGCGGAGACAAG<br>CTGGGTAAGGGCAGGAGTC          | 95<br>57                                   | 21                    | 109.2%<br>101.7%                                                       | 4096<br>T                                              |
| <i>BCL2L1</i> | <a href="#">NM_138578.2</a>    | TGCGTGGAAAAGCGTAGACAA<br>ACAAAAGTATCCCAGCGCC        | 125<br>85                                  | 39                    | 117.8%<br>94.5%                                                        | 1<br>T                                                 |
| <i>BID</i>    | <a href="#">NM_197966.2</a>    | GCCAGAAATGGGATGGACTGA<br>TCTCTAGGAACGCTGTTGACAT     | 127<br>84                                  | 38                    | 102.4%<br>94.0%                                                        | 4096<br>T                                              |
| <i>CASP3</i>  | <a href="#">NM_004346.3</a>    | GGCGTGCATAAAATACCACTG<br>GCGTCAAAGGAAAAGGACTCAAA    | 216<br>171                                 | 91                    | 106.4%<br>89.9%                                                        | 1024<br>U                                              |
| <i>CAV1</i>   | <a href="#">NM_001753.4</a>    | GCAACATCTACAAGCCCAACA<br>GCCTTCCAAATGCCCTCAAAA      | 196<br>154                                 | 72                    | 96.3%<br>91.8%                                                         | 1024<br>U                                              |
| <i>CCNA2</i>  | <a href="#">NM_001237.3</a>    | AAGACGAGACGGGTTTC<br>GGCTGTTTACTGTTCCTTCC           | 89<br>50                                   | 27                    | 102.5%<br>95.4%                                                        | 1<br>T                                                 |
| <i>CCNB2</i>  | <a href="#">NM_004701.3</a>    | CGACCCTTGCCACTACACTT<br>TGACTTCCAATACTTCATTCTCTG    | 244<br>200                                 | 111                   | 101.7%<br>95.7%                                                        | 1<br>U                                                 |
| <i>CCND1</i>  | <a href="#">NM_053056.2</a>    | AGAGGGCGGAGGAGAACAAA<br>TGAGGCGGTAGTAGGACAGG        | 182<br>143                                 | 58                    | 101.5%<br>93.7%                                                        | 1<br>T                                                 |
| <i>CCND3</i>  | <a href="#">NM_001760.4</a>    | CTGTTTCGCTGCCGAGTATG<br>GCATGTGCGGCTTGATCTC         | 186<br>147                                 | 38                    | 94.1%<br>89.8%                                                         | <sup>7</sup> N.I.<br><sup>7</sup> N.I.                 |
| <i>CCNE1</i>  | <a href="#">NM_001238.3</a>    | CCGGTATATGGCGACACAAG<br>TACGCAAACCTGGTCAACTT        | 123<br>83                                  | 57                    | 98.1%<br>94.0%                                                         | 1<br>U                                                 |
| <i>CCNG1</i>  | <a href="#">NM_004060.3</a>    | CCTTGGGTGTGTTGGACTGA<br>GCTATTTCTCCTTTCAAGTGGCA     | 250<br>207                                 | 129                   | 101.8%<br>88.4%                                                        | 1<br>U                                                 |
| <i>CCNH</i>   | <a href="#">NM_001239.3</a>    | TGAGGAGGAAGAATGGACTGA<br>GTTACTGTGAAAGGGAAAAGAAAACA | 189<br>143                                 | 104                   | 107.9%<br>107.4%                                                       | 1<br>T                                                 |
| <i>CDC25A</i> | <a href="#">NM_001789.2</a>    | GTCGCTGTACCAACCT<br>CGGAGGAGCCATTCTCT               | 116<br>80                                  | 38                    | 106.6%<br>90.4%                                                        | 1<br>T                                                 |
| <i>CDC25B</i> | <a href="#">NM_021873.3</a>    | GGCGGGACATCAAGACTG<br>GGGTAGTAGAGGCTGGGGTA          | 209<br>170                                 | 71                    | -<br>-                                                                 | 4096<br>T                                              |
| <i>CDC45</i>  | <a href="#">NM_001178010.2</a> | CTTTGAGTATGACCTCCGCCT<br>AACTTCTGCTTCACTGCTTCA      | 174<br>131                                 | 54                    | 131.6%<br>120.4%                                                       | 1<br>T                                                 |
| <i>CDC6</i>   | <a href="#">NM_001254.3</a>    | ACTTGGTGCTGATTGGTATTGC<br>TGCGAACATCTCCTGAAACA      | 237<br>195                                 | 113                   | 93.7%<br>89.2%                                                         | 4<br>U                                                 |
| <i>CDC7</i>   | <a href="#">NM_003503.3</a>    | ACACCAGGATTCAGAGCACCC<br>TCGTCCACTAAGCAAAGAAAGAA    | 108<br>65                                  | 36                    | 95.3%<br>98.3%                                                         | 4<br>U                                                 |
| <i>CDK1</i>   | <a href="#">NM_001786.4</a>    | AGAAAGTGAAGAGGAAAGGGTTC<br>AGCACATCCTGAAGACTGACTA   | 99<br>54                                   | 35                    | 97.6%<br>87.9%                                                         | 4<br>U                                                 |
| <i>CDK6</i>   | <a href="#">NM_001259.7</a>    | CGTGGTCAGGTTGTTTGATGT<br>CGGTGTGAATGAAGAAAGTCC      | 195<br>153                                 | 86                    | 97.6%<br>88.1%                                                         | 4096<br>T                                              |
| <i>CDK7</i>   | <a href="#">NM_001799.3</a>    | GCCAGAGATAAGAACACCAACC<br>TCCAAAAGCATCAAGGAGACCA    | 162<br>118                                 | 81                    | 93.4%<br>100.7%                                                        | 4<br>U                                                 |
| <i>CDKN1A</i> | <a href="#">NM_000389.4</a>    | TTAGCAGCGGAACAGGAGT<br>GCCGAGAGAAAACAGTCCAG         | 225<br>185                                 | 87                    | 99.1%<br>93.7%                                                         | 4<br>U                                                 |
| <i>CDKN1B</i> | <a href="#">NM_004064.4</a>    | TCTGAGGACACGCATTTGGT<br>CTTAATTCGAGCTGTTTACGTTTGA   | 240<br>195                                 | 91                    | 107.5%<br>94.5%                                                        | 4<br>T                                                 |
| <i>CDKN2C</i> | <a href="#">NM_001262.2</a>    | AGTTCCTGGTGAAGCACACGG<br>CCTCATTCTCCCATAGAGCCT      | 96<br>53                                   | 21                    | 119.2%<br>98.5%                                                        | 4<br>T                                                 |
| <i>CDT1</i>   | <a href="#">NM_030928.3</a>    | GACTCGTGCTGCCCTACAA<br>ACTCCTCAAAAACGCCTACG         | 153<br>115                                 | 42                    | 94.9%<br>88.6%                                                         | 1024<br>U                                              |
| <i>COL1A1</i> | <a href="#">NM_000088.3</a>    | CGGAGCAGACGGGAGTTTC<br>TGTACGCAGGTGATTGGTGG         | 247<br>208                                 | 78                    | 105.5%<br>92.7%                                                        | 4096<br>T                                              |
| <i>DBF4</i>   | <a href="#">NM_006716.3</a>    | GCCAGAAAATCCAAATGTAAGCC<br>TTCAACTCGCCCTCCAGAT      | 118<br>74                                  | 48                    | 103.4%<br>92.1%                                                        | 4<br>U                                                 |
| <i>E2F1</i>   | <a href="#">NM_005225.2</a>    | TGCCAAGAAGTCCAAGAACCA<br>GTCAACCCTCAAGCCGTC         | 81<br>41                                   | 12                    | 121.4%<br>89.2%                                                        | 16384<br>U                                             |
| <i>E2F4</i>   | <a href="#">NM_001950.3</a>    | CGGACCAACCTTCTACTCT<br>GGGGCAAACACTTCTGAGGA         | 156<br>116                                 | 54                    | -<br>-                                                                 | <sup>7</sup> N.I.<br><sup>7</sup> N.I.                 |
| <i>E2F5</i>   | <a href="#">NM_001951.3</a>    | TGATACTTTGGCTGTGAGGCA<br>CAGCACCTACACCTTTCCAC       | 119<br>78                                  | 55                    | 106.3%<br>103.1%                                                       | 4<br>T                                                 |
| <i>E2F7</i>   | <a href="#">NM_203394.2</a>    | CCTTTAGCCACCCAGTATTT<br>ATCCCTCTCTGACCCCTGACC       | 237<br>196                                 | 86                    | 96.8%<br>86.9%                                                         | 1024<br>U                                              |
| <i>EGFR</i>   | <a href="#">NM_005228.4</a>    | AGAGCGACTGCCTGGTCT<br>TACGGGGACACTTCTTCACG          | 159<br>121                                 | 50                    | 94.6%<br>92.3%                                                         | 4096<br>T                                              |
| <i>EWSR1</i>  | <a href="#">NM_013986.3</a>    | ATACTACTCCAAGTCCCTCC<br>TCCATCCTGCGGTCTTGTA         | 197<br>158                                 | 65                    | 95.1%<br>93.8%                                                         | 1024<br>T                                              |

|                |                                |                                                   |            |     |                  |            |
|----------------|--------------------------------|---------------------------------------------------|------------|-----|------------------|------------|
| <i>FN1</i>     | <a href="#">NM_212482.2</a>    | CTGAGGGCAGAAGACACA<br>CCACGACCATTCCCAACACA        | 205<br>164 | 77  | 105.3%<br>86.8%  | 16384<br>U |
| <i>GTSE1</i>   | <a href="#">NM_016426.6</a>    | TGCGGAGAAGCCCAAGAAAGAG<br>TGCGAGATTGCTGGTAGAGCC   | 229<br>186 | 78  | 89.5%<br>101.5%  | 4<br>T     |
| <i>HIF1A</i>   | <a href="#">NM_001530.3</a>    | CGATTTTGGCAGCAACGACACA<br>CGTTTCAGCGGTGGGTAATGGA  | 142<br>120 | 74  | 107.0%<br>91.8%  | 1024<br>T  |
| <i>ID1</i>     | <a href="#">NM_002165.3</a>    | CTGAGGGGAGAACAAGACCGAT<br>CCCCCTAAAGTCTCTGGTGA    | 132<br>91  | 30  | 106.6%<br>90.0%  | 1024<br>T  |
| <i>IFNAR1</i>  | <a href="#">NM_000629.2</a>    | GTGAGAAAACAAAACCAGGAAATAC<br>TGACAAACGGGAGAGCAAAT | 84<br>39   | 28  | 99.8%<br>102.2%  | 4<br>T     |
| <i>IFNAR2</i>  | <a href="#">NM_207585.2</a>    | GGATTTCAGCGGGAACACA<br>CCTTTTATTTCCGGTTCCTCTCT    | 227<br>184 | 114 | 6 -              | 4<br>T     |
| <i>IFNGR1</i>  | <a href="#">NM_000416.2</a>    | TCCAGTTGTTGCTGCTTTACT<br>AACGGCTCTTCACAGACCAC     | 231<br>190 | 125 | 104.2%<br>84.2%  | 16<br>U    |
| <i>IFNGR2</i>  | <a href="#">NM_001329128.1</a> | TTTTCGTTGCTGTCGGTGTC<br>TGGGCTGAGTTGGGCTTTT       | 139<br>100 | 57  | 103.7%<br>91.0%  | 16<br>U    |
| <i>IGF2BP3</i> | <a href="#">NM_006547.2</a>    | TCCCAAAAAGCCAAAGGATTTCG<br>GCTCTCCACCCTCCATACTG   | 107<br>64  | 36  | 108.3%<br>96.1%  | 16<br>U    |
| <i>IL6ST</i>   | <a href="#">NM_002184.3</a>    | GAGGTGTGAGTGGGATGGTG<br>GCGGATTGGGCTCACTTA        | 248<br>208 | 124 | 91.8%<br>95.0%   | 16<br>U    |
| <i>IRF9</i>    | <a href="#">NM_006084.4</a>    | CCATCAAAGCAGACGACAG<br>GCCCTCCTCCTCATTATT         | 122<br>82  | 36  | 96.6%<br>95.7%   | 1024<br>U  |
| <i>JAK1</i>    | <a href="#">NM_002227.3</a>    | CTGGAGTATCTGTTTCTCAGG<br>GCTCGGTCTTGGGCTCTC       | 76<br>36   | 20  | 6 -              | 16<br>T    |
| <i>LOX</i>     | <a href="#">NM_002317.6</a>    | CCAGTACAGCATAACAGGGCA<br>TGGCATCAAAGCAGGTCATAG    | 192<br>152 | 84  | 97.3%<br>90.5%   | 16384<br>T |
| <i>MCM10</i>   | <a href="#">NM_182751.2</a>    | CTTCTCTGGTCTGCGGCTC<br>AGTTTTTCCACTATTCACACTCT    | 197<br>154 | 83  | 101.9%<br>97.8%  | 16<br>U    |
| <i>MCM4</i>    | <a href="#">NM_005914.4</a>    | GCCAAACGCCTCCATCG<br>GGCACTCATCCCGTAGTAAG         | 96<br>58   | 28  | 105.5%<br>92.9%  | 16<br>U    |
| <i>MCM5</i>    | <a href="#">NM_006739</a>      | ACTTCACCAAGCAGAAATACCCG<br>GGCAGAGGTCCAGCAACAT    | 206<br>163 | 56  | 97.2%<br>93.7%   | 16<br>T    |
| <i>MCM6</i>    | <a href="#">NM_005915.5</a>    | AGCGGAACTTTCTGTGCTT<br>CTTCTAAACTGCGGGGGATAC      | 220<br>179 | 102 | 96.6%<br>85.4%   | 16<br>T    |
| <i>MCM7</i>    | <a href="#">NM_005916.4</a>    | AACTGTGCGTGGAATCGTCA<br>GAGACTGGATCGGCTGGTAG      | 110<br>70  | 32  | 105.0%<br>95.1%  | 16<br>T    |
| <i>MCM8</i>    | <a href="#">NM_032485.5</a>    | TCTTCCACAAAGTGCCTGT<br>CCGACCTGCTTCTCTCTGAT       | 142<br>101 | 50  | 96.8%<br>96.8%   | 16<br>T    |
| <i>MCM9</i>    | <a href="#">NM_017696.2</a>    | AGGCTGGGCATTAGTTCTT<br>ATGGTGGTCTTGTGTTTCTG       | 163<br>123 | 64  | 98.2%<br>99.6%   | 16<br>T    |
| <i>MDM2</i>    | <a href="#">NM_002392.5</a>    | ATCAGCAGGAATCATCGGAC<br>GTGGCGTTTTCTTGTGCTT       | 221<br>181 | 105 | 100.2%<br>87.6%  | 64<br>U    |
| <i>MDM4</i>    | <a href="#">NM_002393.4</a>    | TGCCGCTTTTGAAGATTTTGC<br>GAGAGGGCTTGGGCTTTTCA     | 203<br>162 | 89  | 97.6%<br>97.7%   | 64<br>U    |
| <i>MMP2</i>    | <a href="#">NM_004530.5</a>    | GTCCGTGTGAAGTATGGGAAC<br>CCCTGGAAGCGGAATGGAAC     | 236<br>194 | 84  | 103.0%<br>95.8%  | 16384<br>T |
| <i>MUC1</i>    | <a href="#">NM_002456.5</a>    | CTGGTCTGTGTTCTGGTTGC<br>CCACTGCTGGTITGTGTAA       | 250<br>210 | 90  | 104.2%<br>88.4%  | 1024<br>T  |
| <i>MYC</i>     | <a href="#">NM_002467.5</a>    | GGAGGCTATTCTGCCATTT<br>GGCTGCTGTTTTCCACTAC        | 122<br>82  | 33  | 108.2%<br>93.3%  | 1024<br>T  |
| <i>ORC1</i>    | <a href="#">NM_004153.3</a>    | CAAGCCTAGAAGCCACG<br>TACATGCACCTCCGGTATG          | 207<br>169 | 77  | 109.1%<br>99.7%  | 64<br>U    |
| <i>ORC2</i>    | <a href="#">NM_006190.4</a>    | ACCTAGCGGTGACTGTATCTG<br>CTCCACAAAGTGAACCTCCA     | 122<br>80  | 50  | 101.4%<br>92.6%  | 16384<br>U |
| <i>ORC4</i>    | <a href="#">NM_181741.3</a>    | ACACATGCTATTGATGCTTGCT<br>TGCTACACAGTTGGCTTGCT    | 95<br>53   | 31  | 103.7%<br>96.6%  | 64<br>U    |
| <i>ORC5</i>    | <a href="#">NM_002553.3</a>    | TGCCAGAATGCCCACTT<br>TGATGTCTCTCCAAACAAGGA        | 87<br>46   | 22  | 106.7%<br>91.8%  | 64<br>U    |
| <i>ORC6</i>    | <a href="#">NM_014321.3</a>    | GAAGCCCAGCAAAGGAAATG<br>AAATCCCAAAGCCGCAAGT       | 223<br>182 | 108 | 96.2%<br>89.7%   | 1024<br>U  |
| <i>OSMR</i>    | <a href="#">NM_003999.2</a>    | TGTCATCTGGTGGGGAAT<br>CTCAGGGAACCTGGCATCGT        | 142<br>103 | 54  | 95.7%<br>92.9%   | 64<br>U    |
| <i>PCNA</i>    | <a href="#">NM_002592.2</a>    | GTGGAGAATTGGAATGGAA<br>ACCGTTGAGAGAGTGGAGTG       | 160<br>118 | 74  | 96.2%<br>98.0%   | 64<br>T    |
| <i>PDGFA</i>   | <a href="#">NM_002607.5</a>    | CACCACCGCAGCGTCAA<br>CCGTGTCCTTCCCGATAA           | 145<br>108 | 51  | 102.9%<br>94.1%  | 1024<br>T  |
| <i>PIAS1</i>   | <a href="#">NM_001320687.1</a> | ACCTGTCTTCCCTATCTCCC<br>GGTGTGTAATGCTGATTGTCTCC   | 237<br>192 | 111 | 106.4%<br>97.7%  | 64<br>T    |
| <i>PIAS3</i>   | <a href="#">NM_006099.3</a>    | GAGCCGACATCCAAGTTTTAG<br>CCAGAAAGTGAGAAGGGGTCC    | 144<br>102 | 54  | 106.2%<br>101.0% | 64<br>T    |
| <i>PPARG</i>   | <a href="#">NM_138712.3</a>    | TACTCCACATTACGAAGACAT<br>CTCCATAGTGAATCCAGAAG     | 236<br>194 | 110 | 97.1%<br>97.1%   | 4096<br>U  |
| <i>PPM1D</i>   | <a href="#">NM_003620.3</a>    | AAGGTTTTACCTGTCCG<br>GCCATTCGCCAGTTTCTTC          | 100<br>61  | 26  | 111.9%<br>103.0% | 64<br>T    |

|                                                |                                |                                                   |            |     |                          |                                        |
|------------------------------------------------|--------------------------------|---------------------------------------------------|------------|-----|--------------------------|----------------------------------------|
| <i>RB1</i>                                     | <a href="#">NM_000321.2</a>    | AAAGGACCGAGAAGGACCA<br>AAGGCTGAGGTTGCTTGTGT       | 180<br>141 | 85  | 103.4%<br>99.6%          | 64<br>T                                |
| <i>RCHY1</i>                                   | <a href="#">NM_015436.3</a>    | ACTGTGGAATTTGTAGGATTGGT<br>ACATGAGCAACAACACGGGA   | 172<br>129 | 82  | 102.2%<br>98.5%          | 64<br>T                                |
| <i>RPS10</i>                                   | <a href="#">NM_001014.5</a>    | AGCCGCAGAGATGTTGATG<br>CCTCGGACTTGAGAGACTG        | 177<br>138 | 69  | 91.6%<br>89.3%           | 4096<br>U                              |
| <i>RRM2B</i>                                   | <a href="#">NM_015713.4</a>    | TGTGACTTTGCTTGCCTGATG<br>TGCCGTGAAAACCTTTGAGAATCC | 222<br>177 | 109 | 102.5%<br>92.1%          | 256<br>U                               |
| <i>SESN1</i>                                   | <a href="#">NM_014454.2</a>    | GGGAGTGAAGACGCACAGAT<br>GCCGCAGCCATTATCCAA        | 197<br>158 | 95  | 109.6%<br>94.0%          | 256<br>U                               |
| <i>SHISA5</i>                                  | <a href="#">NM_016479.4</a>    | GTGGTGAGGTGTGTATGGCTT<br>AGGTCGCTCCGAACCTGA       | 249<br>209 | 84  | 104.0%<br>93.1%          | 256<br>U                               |
| <i>SIAH1</i>                                   | <a href="#">NM_003031.3</a>    | CGCTCTCCGCCACAGAAT<br>GGACACTCAAAAAGACTCGCCA      | 143<br>101 | 44  | 104.7%<br>90.2%          | 256<br>T                               |
| <i>SKP2</i>                                    | <a href="#">NM_005983.3</a>    | CCCCAGAACTGCTCTCAA<br>ACTCATCAGACGCTAGGCCGA       | 250<br>210 | 97  | 100.4%<br>93.2%          | 256<br>U                               |
| <i>SOCS2</i>                                   | <a href="#">NM_003877.4</a>    | CATGACCCTGCGGTGCTT<br>AAGTTCTTCTGGTGCCTCTTTT      | 209<br>167 | 57  | 67.1%<br>69.9%           | <sup>7</sup> N.I.<br><sup>7</sup> N.I. |
| <i>SORT1</i>                                   | <a href="#">NM_002959.6</a>    | ATGGGAAGAAATCCACAAGCAG<br>ATTCCAGAGCCCAAGGTACG    | 113<br>69  | 39  | 101.0%<br>92.6%          | 4096<br>U                              |
| <i>SOX9</i>                                    | <a href="#">NM_000346.3</a>    | GCTCTGGAGACTTCTGAACGA<br>CCGTTCTTACCAGCTTCTCT     | 132<br>91  | 29  | 98.3%<br>94.0%           | 4096<br>U                              |
| <i>STAT1</i>                                   | <a href="#">NM_139266.2</a>    | GTTATGGGACCGCACCTTCA<br>CACCAACAGTCTCAACTTCACAG   | 148<br>105 | 46  | 107.5%<br>92.1%          | 256<br>U                               |
| <i>STAT2</i>                                   | <a href="#">NM_005419.3</a>    | AGCACCAGGATGATGACAAGG<br>GGGGGATTTCGGGGATAGAGG    | 162<br>121 | 59  | 101.2%<br>84.3%          | 256<br>T                               |
| <i>STAT3</i>                                   | <a href="#">NM_139276.2</a>    | GCCAGAGAGCCAGGAGCATC<br>GGGACATCGGCAGGTCAAT       | 119<br>80  | 37  | 105.8%<br>98.9%          | 256<br>U                               |
| <i>STAT5B</i>                                  | <a href="#">NM_012448.3</a>    | CTGCGAGTCTGCTACTGCTA<br>GAGTCAGGGTTCTGTGGGTA      | 186<br>146 | 61  | 106.0%<br>94.7%          | 256<br>T                               |
| <i>STAT6</i>                                   | <a href="#">NM_001178078.1</a> | GAACATCCAGCCATTCTCTGC<br>TTGGTCCCTTCCACGGTCA      | 202<br>161 | 76  | 96.8%<br>87.2%           | 256<br>T                               |
| <i>SUZ12</i>                                   | <a href="#">NM_015355.3</a>    | AGCCATCACCAAAGTCAAGAA<br>GCTTTTTACCTGTGGAACTTG    | 126<br>83  | 52  | <sup>6</sup> -           | 4096<br>U                              |
| <i>TGFB1</i>                                   | <a href="#">NM_000660.6</a>    | AACAATTCCTGGCGATACCTCA<br>AAGCCCTCAATTTCCCTCC     | 125<br>83  | 33  | 95.9%<br>89.9%           | 16384<br>U                             |
| <i>TGFB2</i>                                   | <a href="#">NM_001135599.3</a> | AAGACCCACATCTCTGCTAA<br>TCGTGTATCCATTTCCACCTT     | 182<br>139 | 74  | 96.2%<br>95.9%           | 16384<br>T                             |
| <i>TGFB3</i>                                   | <a href="#">NM_003239.4</a>    | GCGTGAGTGGCTGTTGAGA<br>AGGATTAGATGAGGGTTGTGGTG    | 216<br>174 | 91  | 90.0%<br>92.2%           | 16384<br>T                             |
| <i>TP53/INP1</i>                               | <a href="#">NM_033285.3</a>    | GCCCAAGTAGTCCAGAGTG<br>AGTTGTATGAGCAGCAAGAGC      | 86<br>45   | 28  | 103.0%<br>93.9%          | <sup>7</sup> N.I.<br><sup>7</sup> N.I. |
| <i>TYK2</i>                                    | <a href="#">NM_003331.4</a>    | AGCTTGACTGTACGATCCG<br>GACTTCTCGCCTTGGTCTC        | 185<br>144 | 55  | 99.4%<br>92.7%           | 256<br>T                               |
| <i>VIM</i>                                     | <a href="#">NM_003380.4</a>    | CAGATGCGTGAAATGGAAGA<br>TGGAAGAGGCAGAGAAATCC      | 222<br>182 | 92  | 110.1%<br>91.5%          | 4096<br>U                              |
| <i>ZMAT3</i>                                   | <a href="#">NM_022470.3</a>    | TATCGAAGGGAGGGGAGCAA<br>TTAAGGAGCCCATCTGCGG       | 247<br>207 | 105 | 108.0%<br>98.8%          | 256<br>T                               |
| <b>TATAA<br/>Universal<br/>DNA Spike<br/>I</b> | n/a                            | n/a<br>n/a                                        | 300<br>n/a | n/a | Not tested<br>Not tested | <sup>7</sup> N.I.<br><sup>7</sup> N.I. |

<sup>1</sup> *n<sub>T</sub>* or *n<sub>U</sub>*: Total number of thymidines or uraciles in sequence between primers.

<sup>2</sup> *PCR E<sub>dTTP</sub>*: Amplification efficiency using dTTP in preamplification.

<sup>3</sup> *PCR E<sub>dUTP</sub>*: Amplification efficiency using dUTP in preamplification.

<sup>4</sup> *Molecules/reaction*: Number of amplicons per reaction. Related to data in Figure 3.

<sup>5</sup> *T* or *U*: Whether amplicon contains thymine (T) or uracil (U). Related to data in Figure 3.

<sup>6</sup> -: Failed amplification.

<sup>7</sup> *N.I.*: Not included.
